# Supplementary material
Source: PubMed Central journal article supplement (PMC3048781)
Supplement: NIHMS272183-supplement-Supplement_3.pdf [file NIHMS272183-supplement-Supplement_3.pdf]

## SUPPLEMENTARY INFORMATION

**Table S1. Genome sequencing strategy.**

| Genome                   | <i>F. verticillioides</i> |                          |                     | <i>F. oxysporum</i> |                     |                          |
|--------------------------|---------------------------|--------------------------|---------------------|---------------------|---------------------|--------------------------|
|                          | Reads                     | Physical Coverage (Fold) | Sequence Coverage * | Reads               | Physical Coverage * | Sequence Coverage (Fold) |
| 4kb Plasmid              | 66,479                    | 3                        | 2.44                | 444,726             | 15                  | 4.44                     |
| 10kb Plasmid             | 144,437                   | 17                       | 1.11                | 102,176             | 9                   | 0.88                     |
| 40kb Fosmid              | 70,511                    | 34                       | 1.08                | 110,003             | 37                  | 0.96                     |
| Plasmid reads (Syngenta) | 235,835                   |                          | 3.83                |                     |                     |                          |
| <b>Total</b>             | <b>517,262</b>            | <b>54</b>                | <b>8.46</b>         | <b>656,905</b>      | <b>106</b>          | <b>6.28</b>              |

\* Q20 base coverage

**Table S2. *F. oxysporum* assembly anchored to the optical maps**

| <b>Optical Contigs</b> | <b>Map estimated size (kb)</b> | <b>Scaffolds</b>      | <b>Scaffold size (kb)</b> |
|------------------------|--------------------------------|-----------------------|---------------------------|
| I                      | 7,451                          | 14, 1, 27             | 6,853                     |
| II                     | 6,444                          | 6, 10, 31             | 5,575                     |
| III                    | 5,497                          | 47, 18, 32, 7, 25     | 5,631                     |
| IV                     | 5,419                          | 8, 4                  | 5,212                     |
| V                      | 5,205                          | 26,2                  | 4,913                     |
| VI                     | 5,143                          | 9, 33, 41, 21, 53, 42 | 4,585                     |
| VII                    | 4,376                          | 5, 13                 | 4,346                     |
| VIII                   | 3,992                          | 3, 29                 | 3,983                     |
| IX                     | 3,434                          | 11, 17                | 3,304                     |
| X                      | 3,422                          | 20, 15, 45            | 2,896                     |
| XI                     | 2,929                          | 35, 12                | 2,336                     |
| XII                    | 2,855                          | 19, 23                | 2,232                     |
| XIII                   | 2,426                          | 16, 39                | 1,750                     |
| XIV                    | 2,269                          | 22, 51, 36            | 1,645                     |
| XV                     | 2,053                          | 37, 38, 24, 28        | 2,434                     |
| <b>Total</b>           | <b>62,917</b>                  |                       | <b>57,697</b>             |

**Table S3. Enriched gene families in three *Fusarium* genomes.**

| Species                         | Transcription        | Carbohydrate-active enzymes <sup>2</sup> |        |    |       |       | Transporters <sup>3</sup> |                |      |
|---------------------------------|----------------------|------------------------------------------|--------|----|-------|-------|---------------------------|----------------|------|
|                                 | Factors <sup>1</sup> | GH                                       | GT     | PL | CBM   | Total | ABC                       | Partial<br>ABC | PDR  |
| <i>Fusarium graminearum</i>     | 716                  | 242                                      | 102    | 21 | 37    | 402   | 54                        | 0              | 19   |
| <i>Fusarium verticillioides</i> | 683                  | 300                                      | 107    | 23 | 46    | 476   | 57                        | 0              | 18   |
| <i>Fusarium oxysporum</i>       | 881                  | 363                                      | 124    | 24 | 44    | 555   | 67                        | 5              | 25   |
| <i>Aspergillus fumigatus</i>    | 562                  | 262                                      | 100    | 14 | 23    | 399   | 42                        | 2              | 15   |
| <i>Neurospora crassa</i>        | 420                  | 171                                      | 74     | 4  | 14    | 263   | 28                        | 0              | 7    |
| <i>Magnaporthe grisea</i>       | 461                  | 231                                      | 92     | 5  | 36    | 364   | 41                        | 1              | 8    |
| <i>Saccharomyces cerevisiae</i> | 295                  | 46                                       | 68     | 0  | 2     | 116   | 22                        | 0              | 10   |
| <i>Candida albicans</i>         | 308                  | 58                                       | 69     | 0  | 1     | 128   | 20                        | 0              | 9    |
| <i>P value*</i>                 | 2.6E-06              | 0.01                                     | 0.0004 | 0  | 2E-11 | 0.001 | 7E-9                      | 0.34           | 5E-7 |

\*The *p*-value (Z score) is calculated using the distribution of gene families in *Fusarium* compared to three other Ascomycete fungi (*Aspergillus fumigatus*, *Neurospora crassa* and *Magnaporthe grisea*)

**Table S4. Classification of transcription factors in three *Fusarium* species**

| TF Family Name <sup>a</sup>               | <i>F. graminearum</i> | <i>F. verticillioides</i> | <i>F. oxysporum</i> | <i>F. oxysporum</i> -LS |
|-------------------------------------------|-----------------------|---------------------------|---------------------|-------------------------|
| APSES                                     | 4                     | 3                         | 3                   | 0                       |
| AT-rich interaction region                | 3                     | 3                         | 3                   | 0                       |
| Bromodomain transcription factor          | 3                     | 3                         | 3                   | 0                       |
| C2H2 zinc finger                          | 76                    | 67                        | 73                  | 10                      |
| CCR4-Not complex component, Not1          | 1                     | 1                         | 1                   | 0                       |
| Centromere protein B, DNA-binding region  | 3                     | 2                         | 6                   | 0                       |
| Cold-shock protein, DNA-binding           | 1                     | 0                         | 0                   | 0                       |
| DDT                                       | 1                     | 1                         | 1                   | 0                       |
| Forkhead                                  | 4                     | 4                         | 5                   | 0                       |
| GATA type zinc finger                     | 7                     | 6                         | 8                   | 1                       |
| Grainyhead/CP2                            | 1                     | 1                         | 1                   | 0                       |
| HMG                                       | 39                    | 36                        | 39                  | 5                       |
| Heat shock factor (HSF)-type, DNA-binding | 3                     | 0                         | 5                   | 2                       |
| Helix-turn-helix type 3                   | 1                     | 1                         | 1                   | 0                       |
| Helix-turn-helix, AraC type               | 8                     | 4                         | 4                   | 0                       |
| Helix-turn-helix, Psq                     | 0                     | 0                         | 1                   | 0                       |
| Heteromeric CCAAT factors                 | 7                     | 6                         | 7                   | 0                       |
| Homeobox                                  | 13                    | 10                        | 13                  | 0                       |
| Homeodomain-like                          | 41                    | 43                        | 63                  | 15                      |
| Lambda repressor-like, DNA-binding        | 2                     | 4                         | 6                   | 2                       |
| MADS-box                                  | 3                     | 2                         | 4                   | 1                       |
| Mating-type protein MAT alpha 1           | 1                     | 1                         | 1                   | 0                       |
| Myb                                       | 17                    | 20                        | 22                  | 0                       |
| NDT80/PhoG like DNA-binding               | 3                     | 3                         | 4                   | 0                       |
| Negative transcriptional regulator        | 2                     | 2                         | 2                   | 0                       |
| Nucleic acid-binding, OB-fold             | 48                    | 46                        | 42                  | 3                       |
| RFX DNA-binding domain                    | 1                     | 1                         | 1                   | 0                       |
| SART1                                     | 1                     | 1                         | 1                   | 0                       |
| SGT1                                      | 1                     | 1                         | 1                   | 0                       |
| Transcription factor TFIIIS               | 2                     | 1                         | 2                   | 0                       |
| Transcription factor jumonji              | 6                     | 6                         | 8                   | 2                       |
| Winged helix repressor DNA-binding        | 28                    | 28                        | 35                  | 3                       |
| YL1 nuclear protein                       | 1                     | 1                         | 1                   | 0                       |
| Zinc finger, BED-type predicted           | 1                     | 1                         | 1                   | 0                       |
| Zinc finger, CCHC-type                    | 12                    | 14                        | 21                  | 6                       |
| Zinc finger, DHHC-type                    | 5                     | 3                         | 5                   | 0                       |
| Zinc finger, GRF-type                     | 1                     | 0                         | 2                   | 0                       |
| Zinc finger, MIZ-type                     | 2                     | 2                         | 2                   | 0                       |
| Zinc finger, PARP-type                    | 0                     | 1                         | 0                   | 0                       |
| Zinc finger, NF-X1-type                   | 2                     | 0                         | 1                   | 0                       |
| Zinc finger, Rad18-type putative          | 3                     | 3                         | 3                   | 0                       |
| Zn2Cys6                                   | 313                   | 311                       | 370                 | 27                      |
| bHLH                                      | 16                    | 15                        | 46                  | 18                      |
| bZIP                                      | 21                    | 19                        | 55                  | 24                      |
| p53-like transcription factor             | 6                     | 4                         | 6                   | 0                       |
| ssDNA-binding transcriptional regulator   | 2                     | 2                         | 2                   | 0                       |
| <b>Total TFs (Genome Ratio %)</b>         | <b>716 (5.37)</b>     | <b>683 (4.82)</b>         | <b>881 (4.97)</b>   | <b>119 (4.86)</b>       |

<sup>a</sup>Individual TFs were classified into families based on the DNA binding domain in each TF. <sup>b</sup>The ratio of TFs to the total proteome. <sup>c</sup>This total number may not be same to the sum of TF numbers for each TF family because some TFs have more than one type of DNA-binding motif.

Table S5. Comparison of pectin lyase enzymes

| PL family                                           | 1  | 3 | 4 | 9 | 11 | 20 | Total |
|-----------------------------------------------------|----|---|---|---|----|----|-------|
| <i>Aspergillus fumigatus</i>                        | 6  | 3 | 3 | 0 | 0  | 1  | 13    |
| <i>Aspergillus niger</i> CBS 513.88                 | 6  | 0 | 2 | 0 | 0  | 0  | 8     |
| <i>Neurospora crassa</i> OR74A                      | 1  | 1 | 1 | 0 | 0  | 1  | 4     |
| <i>Magnaporthe grisea</i> 70-15                     | 2  | 1 | 1 | 0 | 0  | 1  | 5     |
| <i>Fusarium oxysporum</i> f. sp. <i>lycopersici</i> | 11 | 7 | 3 | 2 | 1  | 0  | 24    |
| <i>Fusarium verticillioides</i>                     | 11 | 7 | 3 | 2 | 0  | 0  | 23    |
| <i>Fusarium graminearum</i>                         | 9  | 7 | 3 | 1 | 0  | 1  | 21    |

**Table S6. The five families of *Fusarium* ABC transporters\*.**

|      | <i>F. graminearum</i>                                                                                                                                                                                                                                                      | <i>F. verticilloides</i>                                                                                                                                                                                                                                                                                                                     | <i>F. oxysporum</i>                                                                                                                                                                                                                                                                                                                        |
|------|----------------------------------------------------------------------------------------------------------------------------------------------------------------------------------------------------------------------------------------------------------------------------|----------------------------------------------------------------------------------------------------------------------------------------------------------------------------------------------------------------------------------------------------------------------------------------------------------------------------------------------|--------------------------------------------------------------------------------------------------------------------------------------------------------------------------------------------------------------------------------------------------------------------------------------------------------------------------------------------|
| ABCA | FGSG_08373.3                                                                                                                                                                                                                                                               | FVEG_02321.3<br>FVEG_12730.3+                                                                                                                                                                                                                                                                                                                | FOXG_03449.2<br>FOXG_15400.2+                                                                                                                                                                                                                                                                                                              |
| ABCB | FGSG_01885.3<br>FGSG_10911.3<br><b>FGSG_03805.3</b><br>FGSG_05527.3<br><b>FGSG_03032.3</b><br>FGSG_02749.3<br>FGSG_04336.3<br>FGSG_00541.3<br>FGSG_03323.3<br>FGSG_06881.3<br>FGSG_08823.3<br>FGSG_02786.3<br>FGSG_12704.3<br>FGSG_06771.3<br>FGSG_07516.3<br>FGSG_11988.3 | FVEG_07368.3<br>FVEG_11590.3<br><b>FVEG_12943.3</b><br>FVEG_06970.3<br><b>FVEG_10569.3</b><br>FVEG_08945.3<br>FVEG_11327.3<br>FVEG_00998.3<br>FVEG_08641.3<br>FVEG_05103.3<br>FVEG_02402.3<br>FVEG_13095.3<br>FVEG_04890.3<br>FVEG_05216.3<br>FVEG_12783.3                                                                                   | FOXG_04248.2<br>FOXG_12846.2<br><b>FOXG_16894.2</b><br>FOXG_09366.2<br><b>FOXG_11983.2</b><br>FOXG_10296.2<br>FOXG_13902.2<br>FOXG_00515.2<br>FOXG_09840.2<br>FOXG_01943.2<br>FOXG_03534.2<br>FOXG_15633.2<br>FOXG_07972.2<br>FOXG_02052.2<br>FOXG_15452.2<br>FOXG_16892.2<br>FOXG_11845.2<br>FOXG_04837.2<br>FOXG_12952.2<br>FOXG_04763.2 |
| ABCC | FGSG_06565.3<br>FGSG_09611.3<br>FGSG_00669.3<br><b>FGSG_11028.3</b><br>FGSG_07325.3<br>FGSG_05571.3<br>FGSG_09017.3<br>FGSG_08308.3<br><b>FGSG_06141.3</b><br>FGSG_09707.3<br>FGSG_02316.3<br>FGSG_02139.3<br>FGSG_04440.3<br>FGSG_10995.3<br>FGSG_10547.3<br>FGSG_00046.3 | FVEG_05573.3<br>FVEG_04167.3<br>FVEG_00524.3<br><b>FVEG_12505.3</b><br>FVEG_07940.3<br>FVEG_06924.3<br>FVEG_06686.3<br>FVEG_01831.3<br><b>FVEG_04778.3</b><br>FVEG_06313.3<br>FVEG_11763.3<br>FVEG_07622.3<br>FVEG_03149.3<br>FVEG_09941.3<br>FVEG_10533.3+<br>FVEG_00329.3<br>FVEG_06048.3+<br>FVEG_07254.3<br>FVEG_03281.3<br>FVEG_03317.3 | FOXG_02392.2<br>FOXG_06317.2<br>FOXG_00990.2<br><b>FOXG_17424.2</b><br>FOXG_01579.2<br>FOXG_09320.2<br>FOXG_09082.2<br>FOXG_02981.2<br><b>FOXG_07857.2</b><br>FOXG_08360.2<br>FOXG_13025.2<br>FOXG_04493.2<br>FOXG_08622.2<br>FOXG_05625.2<br>FOXG_10860.2<br>FOXG_11953.2<br>FOXG_04142.2<br>FOXG_04825.2                                 |
| ABCD | FGSG_06012.3<br>FGSG_01526.3<br>FGSG_07383.3                                                                                                                                                                                                                               | FVEG_04642.3<br>FVEG_09605.3<br>FVEG_07897.3                                                                                                                                                                                                                                                                                                 | FOXG_07718.2<br>FOXG_11187.2<br>FOXG_01535.2                                                                                                                                                                                                                                                                                               |

---

 ABCG

|                     |                     |                     |
|---------------------|---------------------|---------------------|
| FGSG_02847.3        | FVEG_13230.3        | FOXG_15760.2        |
| FGSG_09329.3        | FVEG_03775.3        | FOXG_05904.2        |
| FGSG_11272.3        | FVEG_11813.3        | FOXG_13381.2        |
| FGSG_03735.3        | FVEG_10580.3        | FOXG_11989.2        |
| FGSG_04580.3        | FVEG_11089.3        | FOXG_13653.2        |
| FGSG_08312.3        | FVEG_01835.3        | FOXG_02985.2        |
| FGSG_08309.3        | FVEG_01830.3        | FOXG_02979.2        |
| <b>FGSG_10577.3</b> | <b>FVEG_13032.3</b> | <b>FOXG_17147.2</b> |
| FGSG_08830.3        | FVEG_02410.3        | FOXG_03541.2        |
| FGSG_02870.3        | FVEG_13167.3        | FOXG_15712.2        |
| FGSG_10935.3        | FVEG_11615.3        | FOXG_12868.2        |
| FGSG_05076.3        | FVEG_06058.3        | FOXG_08610.2        |
| FGSG_01388.3        | FVEG_09464.3        | FOXG_11327.2        |
| FGSG_05589.3        | FVEG_06901.3        | FOXG_16340.2        |
| FGSG_08027.3        | FVEG_09324.3+       | FOXG_07314.2        |
| FGSG_03882.3        | FVEG_13012.3        | FOXG_06754.2        |
| FGSG_11240.3        | FVEG_10503.3        | FOXG_06510.2        |
| FGSG_10706.3        |                     | FOXG_07190.2        |
|                     |                     | FOXG_11897.2        |
|                     |                     | FOXG_17197.2        |
|                     |                     | FOXG_10675.2        |
|                     |                     | FOXG_16543.2        |
|                     |                     | FOXG_04577.2        |
|                     |                     | FOXG_09300.2        |

---

\*Shaded genes are orthologous for all three *Fusarium* sp. Red color highlights the transporters unique to *Fusarium*

**Table S7. Annotation of the *Fusarium* G protein subunits**

| Protein Class   | Nc Protein | NCU Number | Foxy Number  | Fg Number    | Fv Number    |
|-----------------|------------|------------|--------------|--------------|--------------|
| G alpha Subunit | GNA-1      | NCU06493   | FOXG_09359.2 | FGSG_05535.3 | FVEG_06962.3 |
| G alpha Subunit | GNA-2      | NCU06729.3 | FOXG_05338.2 | FGSG_09988.3 | FVEG_02792.3 |
| G alpha Subunit | GNA-2      | NCU06729.3 | FOXG_08807.2 |              |              |
| G alpha Subunit | GNA-3      | NCU05206.3 | FOXG_06321.2 | FGSG_09614.3 | FVEG_04170.3 |
| G beta Subunit  | GNB-1      | NCU00440.3 | FOXG_11532.2 | FGSG_04104.  | FVEG_10291.3 |
| G gamma Subunit | GNG-1      | NCU00041.3 | FOXG_02181.2 | FGSG_07235.3 | FVEG_05349.3 |
| RACK1 Homologue | CPC-2      | NCU05810.3 | FOXG_05557.2 | FGSG_09870.3 | FVEG_02582.3 |
| Krh1/Gpb1       | No Hits    | No Hits    | No Hits      | No Hits      | No Hits      |
| Krh2/Gpb2       | No Hits    | No Hits    | No Hits      | No Hits      | No Hits      |



Table S8. Predicted G protein coupled receptors (GPCRs) \*

| Species                                              | <i>Neurospora crassa</i> | <i>Magnaporthe grisea</i> | <i>Aspergillus nidulans</i> | <i>Fusarium graminearum</i> | <i>Fusarium oxysporum</i> | <i>Fusarium verticillioides</i> |
|------------------------------------------------------|--------------------------|---------------------------|-----------------------------|-----------------------------|---------------------------|---------------------------------|
| <b>Pheromone Receptors</b>                           | NCU00138                 | MG06452                   | AN7743                      | FGSG_07270                  | FOXG_02147                | FVEG_05310                      |
|                                                      | NCU05758                 | MG04711                   | AN2520                      | FGSG_02655                  | FOXG_10633                | FVEG_09280                      |
| <b>cAMP Receptor-Like Proteins</b>                   | NCU00786                 | MG11962                   | AN3765                      | FGSG_05239                  | FOXG_08375                | FVEG_06210                      |
|                                                      | NCU04626                 | MG06257                   | AN8262                      | FGSG_09693 (5)              | FOXG_08466                | FVEG_06299                      |
|                                                      | NCU09427                 | MG06738                   |                             | FGSG_07716                  | FOXG_04274                | FVEG_07395                      |
|                                                      |                          |                           |                             | FGSG_01861                  | FOXG_10838                | FVEG_13831(4)                   |
|                                                      |                          |                           |                             | FGSG_03023                  | FOXG_14393(5)             | FVEG_13224(2)                   |
|                                                      |                          |                           |                             |                             | FOXG_15087(5)             | FVEG_12377                      |
|                                                      |                          |                           |                             | FOXG_15757(4)               |                           |                                 |
|                                                      |                          |                           |                             | FOXG_15051(2)               |                           |                                 |
|                                                      |                          |                           |                             | FOXG_13170                  |                           |                                 |
| <b>Carbon Sensors</b>                                | NCU06312                 | MG08803<br>MG00258        | No Hits                     | FGSG_05006                  | FOXG_09179                | FVEG_06780                      |
| <b>Stm1-Related Proteins</b>                         | NCU00300                 | MG04698                   | AN5720                      | FGSG_05579                  | FOXG_09314                | FVEG_06916                      |
|                                                      | NCU09195                 | MG02855                   | AN10166                     | FGSG_08496                  | FOXG_03300                | FVEG_02168                      |
| <b>Microbial Opsins</b>                              | NCU10055                 | MG09015                   | AN3361                      | FGSG_07554                  | FOXG_15406                | FVEG_12735                      |
|                                                      | NCU01735                 |                           |                             | FGSG_03064                  | FOXG_15870(5)             | FVEG_09519                      |
|                                                      |                          |                           |                             | FGSG_01440                  | FOXG_12142                | FVEG_10716                      |
|                                                      |                          |                           |                             | FOXG_11274                  |                           |                                 |
| <b>Homologues of <i>Magnaporthe grisea</i> PTH11</b> | NCU06531                 | MG05871                   | AN5639                      | FGSG_03707                  | FOXG_15891                | FVEG_08756                      |
|                                                      | NCU00700                 | MG10473                   | AN1930                      | FGSG_02155                  | FOXG_04477                | FVEG_13472                      |
|                                                      | NCU08624                 | MG07553                   | AN2587                      | FGSG_05821                  | FOXG_09718                | FVEG_09407                      |
|                                                      | NCU05854                 | MG06755                   | AN7774                      | FGSG_03897(6)               | FOXG_11987                | FVEG_02076                      |
|                                                      | NCU07649                 | MG09022                   | AN0178 (4)                  | FGSG_07839                  | FOXG_12029                | FVEG_07442                      |
|                                                      | NCU07591                 | MG07565                   | AN7232                      | FGSG_00994                  | FOXG_10751                | FVEG_07166 (5)                  |
|                                                      | NCU09201                 | MG07946                   | AN7395                      | FGSG_08408                  | FOXG_04316                | FVEG_06016                      |
|                                                      | NCU07538                 | MG11006                   | AN5059                      | FGSG_04529                  | FOXG_04048 (5)            | FVEG_06583 (5)                  |
|                                                      | NCU05189                 | MG09070                   | AN2249                      | FGSG_11381                  | FOXG_03203                | FVEG_08029                      |
|                                                      | NCU05307                 | MG07806                   | AN9444                      | FGSG_07663                  | FOXG_14725                | FVEG_10345                      |
|                                                      | NCU08447                 | MG03584                   | AN9036                      | FGSG_04731                  | FOXG_08949                | FVEG_13718                      |
|                                                      | NCU02903                 | MG05214                   | AN5664                      | FGSG_02374                  | FOXG_07137                | FVEG_13358                      |
|                                                      | NCU09823                 | MG09863                   | AN11159                     | FGSG_05039                  | FOXG_16067                | FVEG_05766                      |
|                                                      | NCU09796                 | MG10407                   | AN8328 (4)                  | FGSG_03464                  | FOXG_15611                | FVEG_02749 (15)                 |
|                                                      | NCU04106                 | MG10571                   | AN1738                      | FGSG_07757                  | FOXG_08656                | FVEG_10611 (6)                  |
|                                                      | NCU07769                 | MG01867                   | AN3395 (5)                  | FGSG_03005                  | FOXG_09988                | FVEG_13015                      |
|                                                      | NCU04931                 | MG09455                   | AN6415 (6)                  | FGSG_04825 (6)              | FOXG_14513 (6)            | FVEG_14001                      |
|                                                      | NCU08718                 | MG10050                   | AN8951                      | FGSG_04159                  | FOXG_11475                | FVEG_11908                      |
|                                                      | NCU09022                 | MG05352                   | AN1540 (5)                  | FGSG_06541                  | FOXG_02583                | FVEG_10583                      |
|                                                      | NCU05101                 | MG07420                   | AN9306                      | FGSG_03800                  | FOXG_03452 (6)            | FVEG_05605                      |
|                                                      | NCU08431                 | MG10442                   | AN8971                      | FGSG_02614                  | FOXG_16509                | FVEG_07611                      |
|                                                      | NCU08429                 | MG02160                   | AN10886                     | FGSG_07136                  | FOXG_01664                | FVEG_08525 (6)                  |
|                                                      | NCU06891                 | MG02001                   | AN10369 (5)                 | FGSG_03237                  | FOXG_05380 (15)           | FVEG_09326                      |
|                                                      | NCU05187                 | MG10257                   | AN2386 (6)                  | FGSG_00101 (6)              | FOXG_16884                | FVEG_00078 (6)                  |
|                                                      | NCU05829                 | MG01905                   | AN10357                     | FGSG_07489                  | FOXG_17564                | FVEG_03296 (4)                  |
|                                                      |                          | MG07987                   | AN7400                      | FGSG_10028 (17)             | FOXG_09687                | FVEG_03544 (4)                  |
|                                                      |                          | MG10438                   | AN4452(5)                   | FGSG_03504                  | FOXG_09958                | FVEG_03509 (3)                  |
|                                                      |                          | MG06171                   | AN6413                      | FGSG_09370                  | FOXG_04850 (4)            | FVEG_13899                      |
|                                                      |                          | MG07851                   | AN8943                      | FGSG_07655 (5)              | FOXG_12335                | FVEG_13048                      |
|                                                      |                          | MG04935                   | AN4378(16)                  | FGSG_03932 (6)              | FOXG_02421                | FVEG_08692 (6)                  |
|                                                      |                          | MG05386                   | AN2575(5)                   | FGSG_10085 (6)              | FOXG_17561                | FVEG_13491                      |
|                                                      |                          | MG09865                   | AN5069                      | FGSG_11343                  | FOXG_14891 (6)            | FVEG_07449                      |
|                                                      |                          | MG05514                   | AN5312                      | FGSG_03688                  | FOXG_07081                | FVEG_05876 (5)                  |
|                                                      |                          | MG06535                   | AN2683 (6)                  | FGSG_01989                  | FOXG_14645 (4)            | FVEG_11641 (6)                  |
|                                                      |                          | MG01190                   | AN9387 (5)                  | FGSG_07601                  | FOXG_13506                | FVEG_13696                      |
|                                                      |                          | MG10581                   | AN0011 (5)                  | FGSG_11161                  | FOXG_16469 (4)            | FVEG_14101                      |
|                                                      |                          | MG03009                   | AN4213 (4)                  | FGSG_03164                  | FOXG_05656 (3)            | FVEG_10934 (5)                  |
|                                                      |                          | MG10747                   | AN7270(5)                   | FGSG_04693 (6)              | FOXG_05684 (6)            | FVEG_08880                      |
|                                                      |                          | MG03935                   | AN7523 (6)                  | FGSG_03151 (6)              | FOXG_10677                | FVEG_10980                      |
|                                                      |                          | MG04682                   | AN9266(4)                   | FGSG_03409                  | FOXG_08793 (5)            | FVEG_13747 (6)                  |
|                                                      | MG09416                  | AN1557(4)                 | FGSG_11529                  | FOXG_09789                  | FVEG_11209 (6)            |                                 |
|                                                      | MG02692                  | AN3349(8)                 | FGSG_03009                  | FOXG_13475                  | FVEG_07701 (6)            |                                 |
|                                                      | MG07857                  | AN2649                    | FGSG_09352                  | FOXG_04322                  | FVEG_10789 (6)            |                                 |
|                                                      | MG00826                  | AN2726 (6)                | FGSG_07841                  | FOXG_03973 (5)              | FVEG_08553                |                                 |

|                                                                         |                          |                               |                             |                              |                                                                                                                 |                                              |
|-------------------------------------------------------------------------|--------------------------|-------------------------------|-----------------------------|------------------------------|-----------------------------------------------------------------------------------------------------------------|----------------------------------------------|
|                                                                         |                          | MG06624                       | AN0171                      | FGSG_02134                   | FOXG_16863                                                                                                      | FVEG_01609 (4)                               |
|                                                                         |                          | MG00435                       | AN3257                      | FGSG_05722                   | FOXG_16533 (3)                                                                                                  | FVEG_00216                                   |
|                                                                         |                          | MG08653                       | AN5943                      | FGSG_10630 (6)               | FOXG_17122 (5)                                                                                                  | FVEG_03914                                   |
|                                                                         |                          | MG10706                       | AN7406(3)                   | FGSG_04749                   | FOXG_05864                                                                                                      | FVEG_10190                                   |
|                                                                         |                          | MG04170                       | AN3241                      | FGSG_07792                   | FOXG_12370 (5)                                                                                                  | FVEG_08564 (6)                               |
|                                                                         |                          | MG08525                       | AN2044                      | FGSG_02981                   | FOXG_13042 (6)                                                                                                  | FVEG_00008                                   |
|                                                                         |                          | MG00277                       | AN3348                      | FGSG_05793                   | FOXG_12111 (6)                                                                                                  | FVEG_03741 (6)                               |
|                                                                         |                          | MG02365                       | AN3886(5)                   | FGSG_03588                   | FOXG_15848 (5)                                                                                                  | FVEG_07488 (5)                               |
|                                                                         |                          | MG06595                       | AN8548                      | FGSG_02401                   | FOXG_04515                                                                                                      | FVEG_12807 (2)                               |
|                                                                         |                          | MG06084                       | AN11079(3)                  | FGSG_03959                   | FOXG_07468                                                                                                      | FVEG_04399 (5)                               |
|                                                                         |                          | MG09437                       | AN4642                      | FGSG_03823                   | FOXG_13775 (5)                                                                                                  | FVEG_10593 (6)                               |
|                                                                         |                          | MG01890                       | AN8512                      | FGSG_11598                   | FOXG_04594                                                                                                      | FVEG_08784(4)                                |
|                                                                         |                          | MG01871                       | AN8984                      | FGSG_01833                   | FOXG_14426                                                                                                      | FVEG_11719                                   |
|                                                                         |                          | MG03794                       | AN0857                      | FGSG_03277                   | FOXG_15055                                                                                                      | FVEG_12016                                   |
|                                                                         |                          | MG09667                       | AN8151                      | FGSG_11385                   | FOXG_01279                                                                                                      | FVEG_10615 (5)                               |
|                                                                         |                          | MG09061                       | AN6924                      | FGSG_03336 (6)               | FOXG_06047                                                                                                      | FVEG_10905 (6)                               |
|                                                                         |                          |                               | AN6946 (5)                  | FGSG_00966                   | FOXG_09944 (6)                                                                                                  | FVEG_10682 (6)                               |
|                                                                         |                          |                               | AN2108                      | FGSG_10946                   | FOXG_11631                                                                                                      | FVEG_11941 (5)                               |
|                                                                         |                          |                               | AN2389(3)                   | FGSG_02853                   | FOXG_09918 (3)                                                                                                  | FVEG_13612                                   |
|                                                                         |                          |                               | AN8661                      | FGSG_02569                   | FOXG_12943                                                                                                      | FVEG_13238 (5)                               |
|                                                                         |                          |                               | AN1317 (5)                  | FGSG_01806                   | FOXG_14011 (6)                                                                                                  | FVEG_08439                                   |
|                                                                         |                          |                               | AN8727                      | FGSG_04500                   | FOXG_15477 (2)                                                                                                  | FVEG_09408 (6)                               |
|                                                                         |                          |                               | AN0500 (5)                  | FGSG_04865                   | FOXG_14208                                                                                                      | FVEG_13145 (5)                               |
|                                                                         |                          |                               | AN0751                      | FGSG_03215                   | FOXG_03205                                                                                                      | FVEG_12373                                   |
|                                                                         |                          |                               | AN6622                      | FGSG_11351                   | FOXG_12528 (4)                                                                                                  | FVEG_10044 (4)                               |
|                                                                         |                          |                               | AN6458 (6)                  | FGSG_11080 (5)               | FOXG_13490                                                                                                      | FVEG_10829 (6)                               |
|                                                                         |                          |                               |                             | FGSG_03091                   | FOXG_15682                                                                                                      | FVEG_12935 (3)                               |
|                                                                         |                          |                               |                             | FGSG_00201                   | FOXG_17114 (5)                                                                                                  | FVEG_09946 (5)                               |
|                                                                         |                          |                               |                             | FGSG_10983                   | FOXG_07138 (6)                                                                                                  | FVEG_09132 (5)                               |
|                                                                         |                          |                               |                             | FGSG_02334 (6)               | FOXG_03847                                                                                                      | FVEG_08689 (2)                               |
|                                                                         |                          |                               |                             | FGSG_03192                   | FOXG_07024 (5)                                                                                                  | FVEG_10131                                   |
|                                                                         |                          |                               |                             | FGSG_03962                   | FOXG_04018 (6)                                                                                                  | FVEG_09357 (5)                               |
|                                                                         |                          |                               |                             | FGSG_04815                   | FOXG_12023 (6)                                                                                                  | FVEG_08466                                   |
|                                                                         |                          |                               |                             | FGSG_10958                   | FOXG_12208                                                                                                      | FVEG_11704 (5)                               |
|                                                                         |                          |                               |                             | FGSG_02844                   | FOXG_07055 (5)                                                                                                  | FVEG_06368 (2)                               |
|                                                                         |                          |                               |                             | FGSG_03310                   | FOXG_02918 (4)                                                                                                  | FVEG_07719 (5)                               |
|                                                                         |                          |                               |                             | FGSG_06439                   | FOXG_16629                                                                                                      |                                              |
|                                                                         |                          |                               |                             | FGSG_02274                   | FOXG_02572                                                                                                      |                                              |
|                                                                         |                          |                               |                             | FGSG_02402                   | FOXG_10585 (5)                                                                                                  |                                              |
|                                                                         |                          |                               |                             | FGSG_02818 (5)               | FOXG_15140 (3)                                                                                                  |                                              |
|                                                                         |                          |                               |                             | FGSG_03104                   | FOXG_12296 (6)                                                                                                  |                                              |
|                                                                         |                          |                               |                             | FGSG_03476                   | FOXG_11781 (4)                                                                                                  |                                              |
|                                                                         |                          |                               |                             | FGSG_09749                   | FOXG_09542 (6)                                                                                                  |                                              |
|                                                                         |                          |                               |                             | FGSG_13429                   | FOXG_10856 (5)                                                                                                  |                                              |
|                                                                         |                          |                               |                             | FGSG_13487                   | FOXG_11694                                                                                                      |                                              |
|                                                                         |                          |                               |                             | FGSG_11662                   | FOXG_10697 (6)                                                                                                  |                                              |
|                                                                         |                          |                               |                             | FGSG_12419(5)                | FOXG_09792 (5)                                                                                                  |                                              |
|                                                                         |                          |                               |                             | FGSG_13972 (6)               | FOXG_10478 (6)                                                                                                  |                                              |
|                                                                         |                          |                               |                             | FGSG_04023                   | FOXG_03932 (6)                                                                                                  |                                              |
|                                                                         |                          |                               |                             | FGSG_13461(4)                | FOXG_08308                                                                                                      |                                              |
|                                                                         |                          |                               |                             | FGSG_12205                   | FOXG_10038                                                                                                      |                                              |
|                                                                         |                          |                               |                             | FGSG_12474 (3)               | FOXG_15596 (2)                                                                                                  |                                              |
|                                                                         |                          |                               |                             | FGSG_12463(3)                | FOXG_15595 (3)                                                                                                  |                                              |
|                                                                         |                          |                               |                             | FGSG_12490(6)                | FOXG_17695 (4)                                                                                                  |                                              |
| <b>Homologues of<br/><i>Homo sapiens</i><br/>mPR-like GPCRs</b>         | NCU04987 (6)<br>NCU03238 | MG05072<br>MG09091<br>MG04679 | AN4932<br>AN10630<br>AN5151 | FGSG_04051 (6)<br>FGSG_01064 | FOXG_00325<br>FOXG_12880<br>FOXG_12495 (6)<br>FOXG_14044(6)<br>FOXG_17118(6)<br>FOXG_14172 (6)<br>FOXG_11596(4) | FVEG_01198<br>FVEG_11630(6)<br>FVEG_10223(4) |
| <b>Rat Growth<br/>Hormone<br/>Releasing Factor-<br/>Related Protein</b> | NCU03253(5)              | MG00532                       | AN6680<br>AN5508            | FGSG_00527 (5)               | FOXG_00532                                                                                                      | FVEG_00981 (5)                               |
| <b>GprK/AtRGS1-<br/>like GPCRs</b>                                      | NCU09883                 | MG13926<br>MG11693            | AN7795                      | FGSG_04628                   | FOXG_13617                                                                                                      | FVEG_11041<br>FVEG_03266 (3)                 |
| <b>FlbA</b>                                                             | NCU08319                 | MG14517                       | AN5893                      | FGSG_06228<br>FGSG_03597     | FOXG_08482<br>FOXG_16355<br>FOXG_06767                                                                          | FVEG_08855<br>FVEG_06192                     |

FOXG\_07329  
FOXG\_06495  
FOXG\_09613  
FOXG\_07099  
FOXG\_17640  
(6.5E-39)

\* Number of TMs in parenthesis

Table S9. Characterization of the secondary metabolite biosynthesis gene clusters<sup>a</sup>

|                  | PKS        | Cluster -id | Size (bp) | Genes | Preferential expression <sup>b</sup> | Known cluster        |           |
|------------------|------------|-------------|-----------|-------|--------------------------------------|----------------------|-----------|
| Non-reducing PKS | FGSG_04588 | FG3_26      | 38179     | 17    | in planta                            |                      |           |
|                  | FGSG_03964 | FG3_25      | 29205     | 9     | poor                                 |                      |           |
|                  | FGSG_02395 | FG3_34      | 29521     | 8     | poor                                 | ZeaA                 |           |
|                  | FGSG_09182 | FG3_15      | 21303     | 8     | sexual                               | PGL1                 |           |
|                  | FVEG_03695 | FV3_16      | 19281     | 7     | Fumonisin                            |                      |           |
|                  | FOXG_05816 | FO2_8       | 19694     | 7     |                                      |                      |           |
|                  | FGSG_02324 | FG3_33      | 25247     | 10    | in culture                           | aurofusarin          |           |
|                  | FVEG_03379 | FV3_12      | 18788     | 7     | Fumonisin                            |                      |           |
|                  | FOXG_04757 | FO2_19      | 18624     | 8     |                                      |                      |           |
| Reducing PKS     | Clade I    | FGSG_03340  | NONE      |       |                                      |                      |           |
|                  |            | FOXG_11954  | NONE      |       |                                      |                      |           |
|                  |            | FVEG_10535  | NONE      |       |                                      |                      |           |
|                  |            | FVEG_05537  | FV3_32    | 24127 | 8                                    | Fumonisin            |           |
|                  |            | FVEG_08425  | FV3_41    | 33102 | 13                                   |                      |           |
|                  |            | FOXG_02884  | FO2_31    | 19644 | 7                                    |                      |           |
|                  |            | FVEG_01736  | FV3_10    | 19430 | 7                                    |                      |           |
|                  |            | FVEG_00316  | FV3_21    | 49188 | 16                                   | Fumonisin            | Fumonisin |
|                  |            | FGSG_01790  | FG3_45    | 17914 | 5                                    | sexual               |           |
|                  |            | FVEG_13715  | FV3_37    | 9568  | 5                                    |                      |           |
|                  |            | FOXG_14850  | NONE      |       |                                      |                      |           |
|                  |            | FOXG_15886  | NONE      |       |                                      |                      |           |
|                  | Clade II   | FGSG_10464  | FG3_35    | 27100 | 11                                   | sexual               |           |
|                  |            | FVEG_12610  | FV3_27    | 22802 | 5                                    |                      |           |
|                  |            | FOXG_15296  | FO2_23    | 22800 | 5                                    |                      |           |
|                  |            | FVEG_11932  | FV3_5     | 35392 | 11                                   | Fumonisin            |           |
|                  |            | FOXG_03945  | FO2_7     | 42649 | 16                                   | transposon insertion |           |
|                  |            | FOXG_14587  | FO2_13    | 32469 | 10                                   |                      |           |
|                  |            | FVEG_10497  | FV3_36    | 28933 | 9                                    | Fumonisin            |           |
|                  |            | FOXG_01189  | FO2_14    | 26645 | 8                                    |                      |           |
|                  |            | FVEG_11086  | FV3_17    | 27587 | 9                                    | Fumonisin            | Fusarin C |
|                  |            | FGSG_07798  | FG3_19    | 26974 | 9                                    | in planta            | Fusarin C |
|                  | Clade III  | FOXG_02741  | FO2_30    | 22204 | 9                                    |                      |           |
|                  |            | FVEG_09961  | FV3_19    | 12742 | 5                                    |                      |           |
|                  |            | FVEG_00079  | FV3_24    | 14557 | 4                                    | Fumonisin            |           |
|                  |            | FGSG_04694  | FG3_1     | 14340 | 4                                    |                      |           |
|                  |            | FVEG_12523  | FV3_28    | 23139 | 7                                    | Fumonisin            |           |
|                  |            | FOXG_15248  | FO2_22    | 25367 | 8                                    |                      |           |
|                  |            | FGSG_08208  | FG3_20    | 31544 | 7                                    | sexual               |           |
| FGSG_08795       |            | FG3_28      | 22447     | 6     | sexual                               |                      |           |
| FVEG_01914       |            | FV3_8       | 21577     | 5     |                                      |                      |           |
| FOXG_03051       |            | FO2_33      | 21645     | 5     |                                      |                      |           |
| FGSG_12126       | FG3_34     | 29521       | 8         | poor  | ZeaB                                 |                      |           |
| FGSG_10548       | FG3_38     | 17838       | 4         | poor  |                                      |                      |           |
| FOXG_10805       | FO2_21     | 28119       | 9         |       |                                      |                      |           |

|    |            |        |       |      |                          |               |
|----|------------|--------|-------|------|--------------------------|---------------|
|    | FGSG_05794 | FG3_12 | 19827 | 6    | constitutively expressed |               |
| TS |            | FG3_13 | 19701 | 12   | constitutively expressed |               |
|    |            | FG3_21 | 27016 | 12   | in planta                | trichothecene |
|    |            | FG3_29 | 21271 | 10   |                          |               |
|    |            | FV3_33 | 21271 | 9    | Fumonisin                |               |
|    |            | FO2_17 | 18689 | 8    |                          |               |
|    |            | FG3_40 | 29834 | 11   | sexual                   |               |
|    | FG3_44     | 26907  | 8     | poor |                          |               |

<sup>a</sup>. Light blue shaded SMB clusters share orthologous PKS based on the PKS phylogeny (Figure S5) and are also conserved in the flanking genes identified in the cluster. None = no cluster identified with the required four SMB related genes within a 20 kb window.

<sup>b</sup>. The co-expression of the clusters under various experiment conditions using published *Fg* microarray data (13). The clusters in green are specifically expressed in *planta*. The clusters in red are specifically expressed during sexual development; and the clusters in brown are expressed in culture. Fumonisin indicates co-expression of *Fv* gene clusters under culture conditions conducive to fumonisin production in a liquid medium.

**Table S10. Pair-wise comparison among three *Fusarium* species.**

|                           | <i>F. oxysporum</i> <sup>a</sup> | <i>F. verticillioides</i> | <i>F. graminearum</i> |
|---------------------------|----------------------------------|---------------------------|-----------------------|
| <i>F. oxysporum</i>       |                                  | 90%                       | 80%                   |
| <i>F. verticillioides</i> | 37,302 kb (90%) <sup>b</sup>     |                           | 80%                   |
| <i>F. graminearum</i>     | 29,018 kb (80%)                  | 28,755 kb (79%)           |                       |

<sup>a</sup> Average sequence identity

<sup>b</sup> Total length of syntenic regions (percentage of the genome)

**Table S11. Transposable elements in three *Fusarium* genomes.**

a.

|            | Class/LTR retrotransposons |         |         | DNA transposons |         |          |        |        |         |           |
|------------|----------------------------|---------|---------|-----------------|---------|----------|--------|--------|---------|-----------|
|            | SINE                       | LTRs    | Total   | Pogo            | hAT     | Helitron | MITEs  | Impala | Others  | Total     |
| <i>Fg</i>  | 360                        | 7,632   | 8,552   | 1,076           | 345     | 0        | 0      | 0      | 2520    | 1,421     |
| <i>Fv</i>  | 248                        | 55,000  | 56,075  | 372             | 999     | 0        | 0      | 0      | 0       | 2,018     |
| <i>Fol</i> | 159,408                    | 274,097 | 433,505 | 491,352         | 629,444 | 163,307  | 21,180 | 14,563 | 342,368 | 1,506,939 |

b.

|                 | Class/LTR retrotransposons |        |        | DNA transposons |        |          |        |        |        |        |
|-----------------|----------------------------|--------|--------|-----------------|--------|----------|--------|--------|--------|--------|
|                 | SINE                       | LTRs   | Total  | Pogo            | hAT    | Helitron | MITEs  | Impala | Others | Total  |
| <i>Fol_Cons</i> | 46.01%                     | 50.98% | 49.15% | 20.78%          | 18.54% | 29.84%   | 5.38%  | 0%     | 22.76% | 5.19%  |
| <i>Fol_LS</i>   | 53.99%                     | 49.02% | 50.85% | 79.22%          | 81.46% | 70.16%   | 94.62% | 100%   | 77.24% | 94.81% |

a). Each type of TE in *Fg*, *Fv* and *Fol* genomes is reported as a total number of bases in each genome.

b). Each type of TE in *Fol* is further located into either *Fol* LS regions or the conserved portion of the genome (*Fol* Cons) and is reported as the percentage distribution between these two regions.

**Table S12. Over-represented GO categories of genes encoded in *Fol* LS regions**

| Go         | name                                             | FDR        | FWER       | p-Value   | #Test | #Ref | #nonAnnotTest | #nonAnnotRef |
|------------|--------------------------------------------------|------------|------------|-----------|-------|------|---------------|--------------|
| GO:0005576 | extracellular region                             | 0.00349266 | 0.0135177  | 7.05E-05  | 19    | 70   | 576           | 6682         |
| GO:0044421 | extracellular region part                        | 8.84E-04   | 0.00154564 | 1.05E-05  | 12    | 23   | 583           | 6729         |
| GO:0005625 | soluble fraction                                 | 4.48E-04   | 6.72E-04   | 3.55E-06  | 12    | 20   | 583           | 6732         |
| GO:0005615 | extracellular space                              | 8.87E-04   | 0.00177332 | 1.20E-05  | 10    | 15   | 585           | 6737         |
| GO:0004568 | chitinase activity                               | 0.00413742 | 0.0174305  | 9.25E-05  | 8     | 12   | 587           | 6740         |
| GO:0006032 | chitin catabolic process                         | 0.00495101 | 0.0232431  | 1.39E-04  | 8     | 13   | 587           | 6739         |
| GO:0006046 | N-acetylglucosamine<br>catabolic process         | 0.00495101 | 0.0232431  | 1.39 E-04 | 8     | 13   | 587           | 6739         |
| GO:0060089 | molecular transducer activity                    | 0.00349266 | 0.0138736  | 7.61E-05  | 23    | 97   | 572           | 6655         |
| GO:0016310 | phosphorylation                                  | 0.00315689 | 0.0102075  | 5.20E-05  | 36    | 189  | 559           | 6563         |
| GO:0004672 | protein kinase activity                          | 0.00315689 | 0.00937104 | 4.43E-05  | 29    | 135  | 566           | 6617         |
| GO:0004871 | signal transducer activity                       | 0.00349266 | 0.0138736  | 7.61E-05  | 23    | 97   | 572           | 6655         |
| GO:0008986 | pyruvate, water dikinase<br>activity             | 3.65E-06   | 3.65E-06   | 2.49E-08  | 9     | 3    | 586           | 6749         |
| GO:0006094 | gluconeogenesis                                  | 0.00258178 | 0.00643367 | 4.10E-05  | 9     | 14   | 586           | 6738         |
| GO:0046364 | monosaccharide biosynthetic<br>process           | 0.00579484 | 0.0316186  | 1.75E-04  | 9     | 18   | 586           | 6734         |
| GO:0019319 | hexose biosynthetic process                      | 0.00579484 | 0.0316186  | 1.75E-04  | 9     | 18   | 586           | 6734         |
| GO:0016781 | phosphotransferase activity,<br>paired acceptors | 3.65E-06   | 3.65E-06   | 2.49E-08  | 9     | 3    | 586           | 6749         |
| GO:0006090 | pyruvate metabolic process                       | 0.00579484 | 0.0316186  | 1.75E-04  | 9     | 18   | 586           | 6734         |
| GO:0004231 | insulysin activity                               | 1.00E-07   | 2.51E-08   | 1.46E-10  | 9     | 0    | 586           | 6752         |
| GO:0000003 | reproduction                                     | 0.00579484 | 0.0327718  | 1.88E-04  | 16    | 57   | 579           | 6695         |
| GO:0003006 | reproductive developmental<br>process            | 2.32E-04   | 2.90E-04   | 1.90E-06  | 9     | 8    | 586           | 6744         |
| GO:0022414 | reproductive process                             | 0.00315689 | 0.00996744 | 4.71E-05  | 13    | 33   | 582           | 6719         |
| GO:0007548 | sex differentiation                              | 1.64E-06   | 8.20E-07   | 6.73E-09  | 9     | 2    | 586           | 6750         |
| GO:0004040 | amidase activity                                 | 0.0011712  | 0.00263172 | 1.81E-05  | 10    | 16   | 585           | 6736         |
| GO:0005871 | kinesin complex                                  | 0.00695187 | 0.0408539  | 1.99E-04  | 4     | 1    | 591           | 6751         |



**Table S13. Annotation of secreted proteins**

| Species                          | Total        | Anchored    |              | Small         |              |          |
|----------------------------------|--------------|-------------|--------------|---------------|--------------|----------|
|                                  | Secreted     | CPGRP       | GPI          | Cysteine-rich | GH           | NEP      |
| <i>Fusarium graminearum</i>      | 1386         | 47          | 88           | 97            | 138          | 4        |
| <i>Fusarium verticillioides</i>  | 1549         | 46          | 86           | 95            | 172          | 4        |
| <b><i>Fusarium oxysporum</i></b> | <b>1803</b>  | <b>46</b>   | <b>91</b>    | <b>126</b>    | <b>210</b>   | <b>7</b> |
| <b><i>p-value</i> *</b>          | <b>2E-05</b> | <b>0.85</b> | <b>3E-05</b> | <b>1e-100</b> | <b>6E-04</b> | <b>0</b> |
| <i>F. oxysporum</i> LS specific  | 253          | 0           | 0            | 26            | 31           | 3        |

\* *p*-value is computed using T-test comparing genes in Fol to other two *Fusarium* genomes. Except GPI anchored proteins, genes Fol LS regions contribute to all other gene family expansions.

**Table S14: Enriched glycosyl hydrolases (GHs) in *Fol*.**

| Family | <i>F. oxysporum</i> | <i>F. verticillioides</i> |                | <i>F. graminearum</i> |      | Putative activities                     |
|--------|---------------------|---------------------------|----------------|-----------------------|------|-----------------------------------------|
|        | Num <sup>1</sup>    | Num                       | % <sup>2</sup> | Num                   | %    |                                         |
| GH5    | 23                  | 19                        | 21%            | 13                    | 77%  | Activity against arabinogalactans       |
| GH43   | 32                  | 24                        | 36%            | 18                    | 75%  | Arabinanases; $\beta$ -1,3-galactanases |
| GH79   | 6                   | 2                         | 200%           | 1                     | 500% | $\beta$ -glucuronidase                  |
| GH28   | 15                  | 9                         | 67%            | 6                     | 150% | Polygalacturonases, against pectin      |
| GH35   | 7                   | 4                         | 75%            | 3                     | 133% | $\beta$ -galactanases                   |
| GH32   | 14                  | 7                         | 100%           | 5                     | 180% | Invertases/endo- and exo-inulinases     |
| GH18   | 30                  | 20                        | 50%            | 19                    | 58%  | Chitinases                              |
| GH76   | 12                  | 9                         | 33%            | 7                     | 71%  | Activity against fungal mannans         |

<sup>1</sup>The number of the each glycoside hydrolase (GH) gene family is characterized by search against a library of catalytic and carbohydrate-binding modules of carbohydrate-active enzymes (see also [www.cazy.org](http://www.cazy.org)) using blastp.

<sup>2</sup>The increase in *Fol* with respect to the number of genes in the other two genomes.

**Table S15. *Fol* carbohydrate-active enzyme (CAZY) genes examined for the presence of transcripts during plant infection.**

| Predicted gene | CAZY family | Putative activity              | Chr(s) | Copy no. | Transcript in <i>planta</i> <sup>1</sup> |
|----------------|-------------|--------------------------------|--------|----------|------------------------------------------|
| FOXG_08862     | GH28        | exo-polygalacturonase pgx4     | 2a     | 1        | Yes                                      |
| FOXG_13051     | GH28        | endo-polygalacturonase pg5     | 9      | 1        | Yes                                      |
| FOXG_14695     | GH28        | endo-polygalacturonase pg1     | 12     | 1        | Yes                                      |
| FOXG_12535     | GH28        | endo-polygalacturonase         | 3,6    | 4        | Yes                                      |
| FOXG_14951     | GH61        | endoglucanase                  | 2b,3   | 2        | Yes                                      |
| FOXG_14383     | GH32        | sucrose-6-phosphate hydrolase  | 1,15   | 2        | Yes                                      |
| FOXG_14385     | GH32        | inulinase                      | 1,15   | 2        | yes                                      |
| FOXG_02657     | GH79        | $\beta$ -glucuronidase         | 8      | 1        | yes                                      |
| FOXG_06568     | GH79        | $\beta$ -glucuronidase         | 3,6    | 3        | no                                       |
| FOXG_04665     | GH78        | $\alpha$ -L-rhamnosidase       | 4      | 1        | yes                                      |
| FOXG_15491     | GH78        | $\alpha$ -L-rhamnosidase       | 15     | 2        | no                                       |
| FOXG_09503     | GH64        | $\beta$ -1,3-glucanase         | 9      | 1        | yes                                      |
| FOXG_12407     | GH64        | $\beta$ -1,3-glucanase         | 3,6    | 2        | no                                       |
| FOXG_14366     | GH76        | $\alpha$ -1,6-mannosidase      | 1,15   | 2        | no                                       |
| FOXG_06755     | GT1         | UDP-glucose sterol transferase | 3,6    | 4        | no                                       |
| FOXG_07014     | GT4         | trehalose phosphorylase        | 6      | 1        | no                                       |
| FOXG_07432     | GT4         | glycosyltransferase            | 3,4    | 2        | no                                       |
| FOXG_12436     | GT8         | glycosyltransferase            | 2,15   | 3        | no                                       |
| FOXG_00921     | GH18        | chitinase 18-3                 | 1      | 1        | yes                                      |
| FOXG_14329     | GH18        | chitinase 18-8                 | 1,15   | 2        | yes                                      |
| FOXG_15172     | CBM12       | chitin-binding domain          | 1,15   | 2        | yes                                      |

<sup>1</sup>As determined by reverse transcriptase PCR analysis of cDNA obtained from tomato plants infected with *Fg* f. sp. *lycopersici* strain 4287 three days after inoculation (see also Figure S17). Plant CAZYS from GH families encoded in LS regions are coloured pink, those from GT families are coloured green and fungal CAZYS are labelled light blue.

**Table S16. Gene-specific primers used for RT-PCR and product sizes.**

| <b>Gene</b> | <b>gDNA<br/>(bp)</b> | <b>cDNA<br/>(bp)</b> | <b>Forward primer (5'→3')</b> | <b>Reverse primer (5'→3')</b> |
|-------------|----------------------|----------------------|-------------------------------|-------------------------------|
| FOXG_00921  | 372                  | 311                  | TTAGTGATGAGTGGGCGGATG         | TGGTAGATGAATGCGGACAGC         |
| FOXG_02259  | 450                  | 395                  | CCAATGAGCTTCCCGACCTC          | CTGGTAGCGGAGAGTCAAGC          |
| FOXG_02657  | 374                  | 317                  | AATACCTCTGGGCAATCGAACT        | GTCATCGGCGGTAGCATTAGA         |
| FOXG_04665  | 456                  | 281                  | TCTGGCATGATGTGGTCGTCT         | GAGTATGCGGTCTGCGTGTC          |
| FOXG_06568  | 472                  | 297                  | AGTCTAGGCACCCGTGTTTGT         | GCCCAGAAGAATCCAGTCAAC         |
| FOXG_06755  | 476                  | 288                  | TGCGATATCTGTCCCGATAGG         | TTTGAGGATGCCGTTATGAGTG        |
| FOXG_07014  | 670                  | 474                  | GCCTTCAAACATGGTCGAAAGT        | GCGAAAGCCAACTTGTAGGAG         |
| FOXG_07432  | 505                  | 444                  | CTCCTCGGGCGGTTACAAAG          | TCATGGATAGACCGTCGTTGG         |
| FOXG_08862  | 387                  | 328                  | GTACAGCATTGCCTCGCCAC          | CGGGTTTCTCATTTCGCAGGTT        |
| FOXG_09503  | 219                  | 219                  | TCTGCGAGGGCTTGAAGCGT          | CCCATTCTGCCTGCGTGTTG          |
| FOXG_12407  | 482                  | 355                  | GATCAGCTTCTCTGCGAGGG          | TGTCTCATCTTAATACCGTGTAC       |
| FOXG_12436  | 495                  | 414                  | GTTCGACATAAGGATAATACGGA       | TATTCGGAGCCCAGATACTTG         |
| FOXG_12535  | 426                  | 368                  | CTGGAAAGACTCTGGACCTGA         | TGTGTCCGCCAGTTTGTGCG          |
| FOXG_13051  | 389                  | 341                  | GCCTGGTCGCCTCCGTACTION        | TCTTCTTGCCGCCGTTGCTG          |
| FOXG_14329  | 391                  | 330                  | AGCCCAACGAGCCGTCAAGT          | AACTGCCGCCAGCGTATGAG          |
| FOXG_14366  | 470                  | 362                  | CGTCTGGAATAAGGTTGTCAAG        | CCCGCTTTTCTGCTATTGTGA         |
| FOXG_14383  | 400                  | 400                  | GGCTCCTCCGCTTGCTCCT           | TGCTGCCATCTTTGCTAGTCG         |
| FOXG_14385  | 407                  | 407                  | GAGCAAGAGAAACCGCACGAT         | ATCACGCCCAAAGTCGAGCC          |
| FOXG_14695  | 328                  | 277                  | GCAGCGTCACTGACTACTCC          | GTTAGAACCTTCGCCATCCCA         |
| FOXG_14951  | 365                  | 365                  | GCTGGCTCGTTCAGATCCCT          | CGGGAGCAGCAGCGGAGAT           |
| FOXG_15172  | 443                  | 443                  | GACGCACGCAAGAACGCCTA          | ACGCTGTGACACCGCATGGA          |
| FOXG_15491  | 437                  | 379                  | CGATTTGGCATGATGTGGTTGT        | GCCTCTGGTGACACGTATTC          |
| FOXG_16779  | 439                  | 381                  | GCCCAGCAGCAGTTTACATCT         | TGTCCGCAGAGCCTAGATAGA         |
| FOXG_01569  |                      |                      |                               |                               |
| Actin 1     | 478                  | 429                  | GAGGGACCGCTCTCGTCGT           | GGAGATCCAGACTGCCGCTCAG        |

Table S17. Lipid metabolism-related gene expansion in *Fol* LS regions\*

| Species                                                | <i>F. oxysporum</i>  | <i>F. verticillioides</i> | <i>F. graminearum</i> | <i>Neurospora crassa</i> | <i>Magnaporthe grisea</i> | <i>Aspergillus nidulans</i> |
|--------------------------------------------------------|----------------------|---------------------------|-----------------------|--------------------------|---------------------------|-----------------------------|
| <b>Homologues</b>                                      | FOXG_00325           | FVEG_01198                | FGSG_04051 (6)        |                          |                           |                             |
| <i>Homo sapiens</i>                                    |                      |                           |                       | NCU04987 (6)             | MG05072                   | AN4932                      |
| <b>mPR-like GPCRs</b>                                  | FOXG_12880           | FVEG_11630(6)             | FGSG_01064            | NCU03238                 | MG09091                   | AN10630                     |
|                                                        | FOXG_12495 (6)       | FVEG_10223(4)             |                       |                          | MG04679                   | AN5151                      |
|                                                        | FOXG_14044(6)        |                           |                       |                          |                           |                             |
|                                                        | FOXG_17118(6)        |                           |                       |                          |                           |                             |
|                                                        | FOXG_14172 (6)       |                           |                       |                          |                           |                             |
|                                                        | FOXG_11596(4)        |                           |                       |                          |                           |                             |
| <b>Perilipin-like gene (CAP20)</b>                     | FOXG_07916           | FVEG_04839                | FGSG_05177            | NCU03370                 | MGG_11916                 | AN10518                     |
|                                                        | FOXG_06858           |                           |                       |                          |                           |                             |
|                                                        | FOXG_07131           |                           |                       |                          |                           |                             |
|                                                        | FOXG_07164           |                           |                       |                          |                           |                             |
|                                                        | FOXG_15915           |                           |                       |                          |                           |                             |
|                                                        | FOXG_16152           |                           |                       |                          |                           |                             |
|                                                        | FOXG_16227           |                           |                       |                          |                           |                             |
|                                                        | FOXG_16658           |                           |                       |                          |                           |                             |
|                                                        | FOXG_16721           |                           |                       |                          |                           |                             |
| <b>Phosphoinositide-specific phospholipase C (PLC)</b> | FOXG_07611           | FVEG_04539                | FGSG_05898            | NCU001266                | MGG_02497                 | AN6389                      |
|                                                        | FOXG_12081           |                           |                       | NCU06245                 |                           |                             |
|                                                        | FOXG_06661           |                           |                       | NCU09655                 |                           |                             |
|                                                        | FOXG_07227           |                           |                       | NCU02175                 |                           |                             |
|                                                        | FOXG_15032           |                           |                       |                          |                           |                             |
|                                                        | FOXG_06598           |                           |                       |                          |                           |                             |
|                                                        | FOXG_14448           |                           |                       |                          |                           |                             |
|                                                        | FOXG_07102           |                           |                       |                          |                           |                             |
| <b>Lipase - carboxylic esters</b>                      | FOXG_15813           | FVEG_13281                | FGSG_09122            | NCU09575                 | MGG_02497                 | AN6389                      |
|                                                        | FOXG_17621           | FVEG_12978                |                       |                          |                           |                             |
|                                                        | FOXG_13461           | FVEG_13937                |                       |                          |                           |                             |
|                                                        | FOXG_14397           |                           |                       |                          |                           |                             |
|                                                        | FOXG_14401           |                           |                       |                          |                           |                             |
|                                                        | FOXG_14404           |                           |                       |                          |                           |                             |
|                                                        | FOXG_15281           |                           |                       |                          |                           |                             |
|                                                        | FOXG_15077           |                           |                       |                          |                           |                             |
|                                                        | FOXG_15080           |                           |                       |                          |                           |                             |
|                                                        | FOXG_15083           |                           |                       |                          |                           |                             |
| <i>FlibA</i>                                           | FOXG_08482           | FVEG_08855                | FGSG_06228            | NCU08319                 | MGG_14517                 | AN5893                      |
|                                                        | FOXG_16355           | FVEG_06192                | FGSG_03597            |                          |                           |                             |
|                                                        | FOXG_06767           |                           |                       |                          |                           |                             |
|                                                        | FOXG_07329           |                           |                       |                          |                           |                             |
|                                                        | FOXG_06495           |                           |                       |                          |                           |                             |
|                                                        | FOXG_09613           |                           |                       |                          |                           |                             |
|                                                        | FOXG_07099           |                           |                       |                          |                           |                             |
|                                                        | FOXG_17640 (6.5E-39) |                           |                       |                          |                           |                             |
| <b>Kinases (cdc2)</b>                                  | FOXG_09513           | FVEG_07140                | FGSG_05393            | NCU01266                 | MGG_02444                 | AN0664                      |
|                                                        | FOXG_03267           | FVEG_02139                | FGSG_08468            |                          |                           |                             |
|                                                        | FOXG_09498           | FVEG_07125                | FGSG_05406            |                          |                           |                             |
|                                                        |                      | FVEG_10803                | FGSG_03132            |                          |                           |                             |
|                                                        | FOXG_17471           |                           |                       |                          |                           |                             |
|                                                        | FOXG_06983           |                           |                       |                          |                           |                             |
|                                                        | FOXG_07291           |                           |                       |                          |                           |                             |
|                                                        | FOXG_06877           |                           |                       |                          |                           |                             |
|                                                        | FOXG_06534           |                           |                       |                          |                           |                             |
|                                                        | FOXG_06733           |                           |                       |                          |                           |                             |
|                                                        | FOXG_03267           |                           |                       |                          |                           |                             |
|                                                        | FOXG_16245           |                           |                       |                          |                           |                             |
|                                                        | FOXG_16169           |                           |                       |                          |                           |                             |
|                                                        | FOXG_06842           |                           |                       |                          |                           |                             |
|                                                        | FOXG_16211           |                           |                       |                          |                           |                             |
|                                                        | FOXG_16133           |                           |                       |                          |                           |                             |

\*Yellow highlights the orthologous genes among three *Fusarium* genomes, while all others are Fol LS expansions.

**Table S18. Proteins involved in chromatin silencing pathways\*.**

**1. DNA methyltransferase homologues**

**a. RID homologues (DMT domain of unknown enzymatic function)**

| Species    | Locus        | Name   | Chromosome | EST  |
|------------|--------------|--------|------------|------|
| <i>Fg</i>  | FGSG_08648.3 | FgRID  | 2          | none |
| <i>Fv</i>  | FVEG_02018.3 | FvRID  | 6          | none |
| <i>Fol</i> | FOXG_03151.2 | FolRID | 8          | none |

**b. DIM-2-type DNA methyltransferase homologues**

| Species    | Locus        | Name    | Chromosome | EST        |
|------------|--------------|---------|------------|------------|
| <i>Fg</i>  | FGSG_10766.3 | FgDIM2  | 3          | none       |
| <i>Fv</i>  | FVEG_11429.3 | FvDIM2  | 7          | incomplete |
| <i>Fol</i> | FOXG_12693.2 | FolDIM2 | 9          | none       |

**2. Histone H3 Lysine9 methyltransferase DIM-5 homologues**

| Species    | Locus        | Name    | Chr | EST        |
|------------|--------------|---------|-----|------------|
| <i>Fg</i>  | FGSG_02778.3 | Fg Dim5 | 1   | incomplete |
| <i>Fv</i>  | FVEG_08911.3 | Fv Dim5 | 5   | complete   |
| <i>Fol</i> | FOXG_10263.2 | FolDim5 | 7   | complete   |

**3. Heterochromatin Protein 1 (HP1) homologues**

| Species    | Locus        | Name   | Chr | EST      |
|------------|--------------|--------|-----|----------|
| <i>Fg</i>  | FGSG_08763.3 | FgHP1  | 2   | none     |
| <i>Fv</i>  | FVEG_01876.3 | FvHP1  | 6   | complete |
| <i>Fol</i> | FOXG_03020.2 | FolHP1 | 8   | complete |

**4. RNA-dependent RNA Polymerase homologues**

| Species    | Locus        | Name    | Chr | EST        |
|------------|--------------|---------|-----|------------|
| <i>Fg</i>  | FGSG_06504.3 | FgQde1  | 4   | incomplete |
| <i>Fv</i>  | FVEG_05646.3 | FvQde1  | 3   | none       |
| <i>Fol</i> | FOXG_02461.2 | FolQde1 | 5   | none       |
| <i>Fg</i>  | FGSG_08716.3 | FgSad1  | 2   | none       |
| <i>Fv</i>  | FVEG_01945.3 | FvSad1  | 6   | none       |
| <i>Fol</i> | FOXG_03081.2 | FolSad1 | 8   | none       |
| <i>Fg</i>  | FGSG_01582.3 | FgRdp3  | 1   | none       |
| <i>Fv</i>  | FVEG_09667.3 | FvRdp3  | 1   | incomplete |
| <i>Fol</i> | FOXG_11123.2 | FolRdp3 | 1   | incomplete |

**5. Dicer homologues**

| Species    | Locus        | Name    | Chr | EST        |
|------------|--------------|---------|-----|------------|
| <i>Fg</i>  | FGSG_09025.3 | FgDcl1  | 4   | none       |
| <i>Fv</i>  | FVEG_06696.3 | FvDcl1  | 7   | none       |
| <i>Fol</i> | FOXG_09093.2 | FolDcl1 | 9   | none       |
| <i>Fg</i>  | FGSG_04408.3 | FgDcl2  | 2   | none       |
| <i>Fv</i>  | FVEG_11254.3 | FvDcl2  | 9   | incomplete |
| <i>Fol</i> | FOXG_13826.2 | FolDcl2 | 10  | incomplete |

**6. Argonaute homologues**

| Species   | Locus        | Name   | Chr | EST        |
|-----------|--------------|--------|-----|------------|
| <i>Fg</i> | FGSG_08752.3 | FgQde2 | 2   | Incomplete |
| <i>Fv</i> | FVEG_01865.3 | FvQde2 | 6   | Incomplete |

|                   |                     |                  |           |             |
|-------------------|---------------------|------------------|-----------|-------------|
| <i>Fol</i>        | FOXG_03010.2        | FolQde2          | 8         | Incomplete  |
| <b><i>Fol</i></b> | <b>FOXG_12456.2</b> | <b>FolQde2-2</b> | <b>3</b>  | <b>none</b> |
| <b><i>Fol</i></b> | <b>FOXG_14081.2</b> | <b>FolQde2-3</b> | <b>6</b>  | <b>none</b> |
| <b><i>Fol</i></b> | <b>FOXG_16455.2</b> | <b>FolQde2-4</b> | <b>14</b> | <b>none</b> |
| <i>Fg</i>         | FGSG_00348.3        | FgSms2           | 1         | none        |
| <i>Fv</i>         | FVEG_00803.3        | FvSms            | 1         | none        |
| <i>Fol</i>        | FOXG_00711.2        | FolSms2          | 1         | none        |

\* Loci were identified by using *Fg* or *Neurospora crassa* predicted and known protein sequences as baits in tblastn searches of the *Fusarium* genomes with default settings. All genes except for the three non-orthologous *QDE2* homologues of *Fol* are located on non-LS chromosomes. The non-orthologous *Fol QDE2* proteins (shown on bold) are more closely related to *Ajellomyces capsulatus*, *Aspergillus* spp. and *Pyrenophora tritici-repentis*.

**Table S19. Pearson correlation coefficient ( $r$ ) of codon usage between chromosome pairs.**

|       | Chr1  | Chr2  | Chr4  | Chr5  | Chr7  | Chr8  | Chr9  | Chr10 | Chr11 | Chr12 | Chr13 | Chr3  | Chr6  | Chr14 |
|-------|-------|-------|-------|-------|-------|-------|-------|-------|-------|-------|-------|-------|-------|-------|
| Chr2  | 0.999 |       |       |       |       |       |       |       |       |       |       |       |       |       |
| Chr4  | 0.999 | 0.999 |       |       |       |       |       |       |       |       |       |       |       |       |
| Chr5  | 0.999 | 1.000 | 0.999 |       |       |       |       |       |       |       |       |       |       |       |
| Chr7  | 0.999 | 0.999 | 1.000 | 1.000 |       |       |       |       |       |       |       |       |       |       |
| Chr8  | 0.999 | 0.999 | 1.000 | 1.000 | 1.000 |       |       |       |       |       |       |       |       |       |
| Chr9  | 0.999 | 0.999 | 0.999 | 0.999 | 0.999 | 0.999 |       |       |       |       |       |       |       |       |
| Chr10 | 0.999 | 0.999 | 1.000 | 0.999 | 1.000 | 0.999 | 0.999 |       |       |       |       |       |       |       |
| Chr11 | 0.994 | 0.996 | 0.998 | 0.997 | 0.997 | 0.997 | 0.997 | 0.998 |       |       |       |       |       |       |
| Chr12 | 0.994 | 0.996 | 0.997 | 0.996 | 0.996 | 0.997 | 0.996 | 0.997 | 0.999 |       |       |       |       |       |
| Chr13 | 0.993 | 0.996 | 0.997 | 0.996 | 0.996 | 0.997 | 0.996 | 0.997 | 0.999 | 0.999 |       |       |       |       |
| Chr3  | 0.992 | 0.992 | 0.990 | 0.992 | 0.990 | 0.991 | 0.990 | 0.991 | 0.989 | 0.989 | 0.989 |       |       |       |
| Chr6  | 0.992 | 0.993 | 0.991 | 0.993 | 0.991 | 0.992 | 0.991 | 0.992 | 0.990 | 0.990 | 0.990 | 1.000 |       |       |
| Chr14 | 0.987 | 0.990 | 0.988 | 0.990 | 0.987 | 0.988 | 0.987 | 0.988 | 0.987 | 0.986 | 0.988 | 0.997 | 0.997 |       |
| Chr15 | 0.993 | 0.992 | 0.991 | 0.993 | 0.992 | 0.992 | 0.991 | 0.992 | 0.988 | 0.989 | 0.987 | 0.998 | 0.998 | 0.993 |



Table S20. Amino acids with significant codon bias in the *Fol* LS chromosomes

| Amino acid | Codon | Number of codons in conserved regions (%) |        | Number of codon in <i>Fol</i> LS regions (%) |        | P-value* |
|------------|-------|-------------------------------------------|--------|----------------------------------------------|--------|----------|
| Q          | CAA   | 166721                                    | 53.74% | 22461                                        | 48.79% | 1.00E-86 |
|            | CAG   | 143544                                    | 46.26% | 23576                                        | 51.21% | 1.00E-86 |
|            | total | 310265                                    |        | 46037                                        |        |          |
| C          | TGT   | 87368                                     | 45.16% | 11409                                        | 42.75% | 1.00E-13 |
|            | TGC   | 106112                                    | 54.84% | 15281                                        | 57.25% | 1.00E-13 |
|            | Total | 193480                                    |        | 26690                                        |        |          |
| A          | GCA   | 127397                                    | 24.79% | 19537                                        | 24.72% | 0.35     |
|            | GCC   | 135711                                    | 26.40% | 22477                                        | 28.44% | 1.00E-30 |
|            | GCG   | 94290                                     | 18.35% | 15659                                        | 19.81% | 1.00E-20 |
|            | GCT   | 156573                                    | 30.46% | 21357                                        | 27.02% | 1.00E-80 |
|            | total | 513971                                    |        | 79030                                        |        |          |
| G          | GGC   | 131445                                    | 29.97% | 22031                                        | 32.31% | 1.00E-30 |
|            | GGG   | 72143                                     | 16.45% | 13128                                        | 19.25% | 1.00E-70 |
|            | GGA   | 123164                                    | 28.09% | 17921                                        | 26.28% | 1.00E-20 |
|            | GGT   | 111775                                    | 25.49% | 15107                                        | 22.16% | 1.00E-78 |
|            | Total | 438527                                    |        | 68187                                        |        |          |
| V          | GTC   | 129752                                    | 32.55% | 18820                                        | 32.07% | 0.02     |
|            | GTA   | 64982                                     | 16.30% | 10286                                        | 17.53% | 1.00E-10 |
|            | GTG   | 89308                                     | 22.41% | 14147                                        | 24.11% | 1.00E-19 |
|            | GTT   | 114564                                    | 28.74% | 15430                                        | 26.29% | 1.00E-30 |
|            | Total | 398606                                    |        | 58683                                        |        |          |
| T          | ACC   | 118093                                    | 34.71% | 16778                                        | 34.20% | 0.06     |
|            | ACA   | 129291                                    | 38.01% | 17878                                        | 36.44% | 1.00E-07 |
|            | ACT   | 117785                                    | 34.62% | 15832                                        | 32.27% | 1.00E-18 |
|            | ACG   | 93106                                     | 27.37% | 15351                                        | 31.29% | 1.00E-60 |
|            | Total | 340182                                    |        | 49061                                        |        |          |
| E          | GAA   | 153574                                    | 46.16% | 23891                                        | 45.15% | 1.00E-05 |
|            | GAG   | 179115                                    | 53.84% | 29019                                        | 54.85% | 1.00E-05 |
|            | Total | 332689                                    |        | 52910                                        |        |          |

\* P-value

determined using Fisher's exact test to examine the significance of codons used between conserved versus LS regions. Pink indicates codons with increased usage among the *Fol* LS genes. Blue indicates the codons with decreased usage among the *Fol* LF genes.

**Table S21 Distance matrix of *Fol* LS homologous genes among selected fungal genomes\***

|                                  | <i>Fo</i> LS<br>genes | <i>Fs</i><br>homo | <i>Fo</i><br>conserved<br>homo | <i>Fv</i><br>homo | <i>Fg</i><br>homo | <i>M. grisea</i><br>homo | <i>N crassa</i><br>homo | <i>A. nidulans</i><br>homo | <i>A. oryzae</i><br>homo |
|----------------------------------|-----------------------|-------------------|--------------------------------|-------------------|-------------------|--------------------------|-------------------------|----------------------------|--------------------------|
| <i>Fo</i><br>LS genes            | -                     | 0.436             | 0.487                          | 0.542             | 0.538             | 0.682                    | 0.721                   | 0.714                      | 0.703                    |
| <i>Fs</i><br>homologs            | 1058                  | -                 | 0.148                          | 0.195             | 0.177             | 0.260                    | 0.292                   | 0.300                      | 0.294                    |
| <i>Fo</i> _conserved<br>homologs | 1180                  | 358               | -                              | 0.111             | 0.115             | 0.238                    | 0.265                   | 0.269                      | 0.269                    |
| <i>Fv</i><br>homologs            | 1313                  | 473               | 269                            | -                 | 0.082             | 0.201                    | 0.209                   | 0.227                      | 0.229                    |
| <i>Fg</i><br>homologs            | 1304                  | 430               | 278                            | 199               | -                 | 0.194                    | 0.203                   | 0.229                      | 0.222                    |
| <i>M. grisea</i><br>homologs     | 1654                  | 630               | 576                            | 487               | 470               | -                        | 0.099                   | 0.126                      | 0.126                    |
| <i>N crassa</i><br>homologs      | 1747                  | 707               | 643                            | 506               | 491               | 241                      | -                       | 0.153                      | 0.154                    |
| <i>A. nidulans</i><br>homologs   | 1731                  | 727               | 651                            | 550               | 555               | 305                      | 372                     | -                          | 0.080                    |
| <i>A. oryzae</i><br>homologs     | 1703                  | 713               | 651                            | 554               | 537               | 305                      | 374                     | 194                        | -                        |

\* The distance is measured by the presence and absence of homologous gene in each genome through blastp search (1e-20). Only genes encoded in the conserved regions of *Fol* genome are used for the search within *Fol* genome. Below diagonal: Total character differences; Above diagonal: Mean character differences.

**Table 22: Peptides from Six5, Six6 and Six7 identified with mass spectrometry.**

| Protein | Peptide                          | Peptide mass (MS) <sup>1</sup> | Amino acid sequence(MS/MS) <sup>1</sup> |
|---------|----------------------------------|--------------------------------|-----------------------------------------|
| Six5    | AANGKIDGDTFYNLCINNGGADSTCFDCSK   | spot 17                        | p12 <sup>2</sup>                        |
|         | IDGDTFYNLCINNGGADSTCFDCSK        | spot 17                        |                                         |
|         | CINNGGADSTCFDCSK                 | spot 17                        | spot 17                                 |
|         | NVIYCDA                          | spot 17                        | p12 <sup>2</sup>                        |
|         | FAGIYLK                          | spot 17                        | spot 17 <sup>3</sup>                    |
|         | TSPAYWFADR                       | spot 17                        | spot 17                                 |
|         | SYLWAQTSPAYWFADR                 | spot 17                        |                                         |
|         | RDHQYCACQSGSGDSIDIDATTQLQNDNSK   | spot 17                        |                                         |
| Six6    | SFCVANPR                         | spot 16                        | spot 16                                 |
|         | ITDTPCQPR                        | spot 16                        | spot 16                                 |
|         | EKITDTPCQPR                      | spot 16                        | spot 16                                 |
|         | DTLPVSTCPAGQKYDR                 | spot 16                        |                                         |
|         | EGCTTTSVNPAGYHHLGTIVYDINK        | spot 16                        |                                         |
|         | EGCTTTSVNPAGYHHLGTIVYDINKNPIEVDK | spot 16                        |                                         |
|         | ISYFGEPGNVNEGIGGSTS YFSSDNFQFSK  | spot 16                        |                                         |
| Six7    | TTFVEVR                          | spot 21                        | spot 21                                 |
|         | QGQCFSTTGSTPPRPPAAR              | spot 21                        | spot 21                                 |
|         | EVTFDITQNVNTFTSAASTPWTEGVGLSNIR  | spot 21                        |                                         |
|         | VFGTAEAQVLLPDAPGTSR              | spot 21                        |                                         |

<sup>1</sup> spot numbers in the 2-D gel with pH range 3-10 as published in Houterman *et al.* (2007)<sup>76</sup>.

<sup>2</sup> p12: Found among previously unidentified peptides in 12 kDa protein band reported in Rep *et al.* 2004<sup>77</sup>.

<sup>3</sup> also found in spot 18 of the gel with pH range 6-11<sup>76</sup>.

**Table S23: SIX genes used in this study.**

| Gene        | Accession | Reference <sup>1</sup>                     | Length <sup>2</sup> | Cys <sup>3</sup> | Introns | Position on chromosome 14 <sup>4</sup> |
|-------------|-----------|--------------------------------------------|---------------------|------------------|---------|----------------------------------------|
| <i>SIX1</i> | AJ608702  | Rep <i>et al.</i> 2004 <sup>77</sup>       | 263 [189]           | 8                | 0       | scaffold 36: 116409-116848             |
| <i>SIX2</i> | AJ608703  | Houterman <i>et al.</i> 2007 <sup>76</sup> | 212 [172]           | 8                | 0       | scaffold 36: 108933-109802             |
| <i>SIX3</i> | AM234063  | Houterman <i>et al.</i> 2007 <sup>76</sup> | 144                 | 2                | 0       | scaffold 36: 5017-5484                 |
| <i>SIX5</i> | FJ767863  | unidentified #2<br>PH2007 <sup>76</sup>    | 102                 | 6                | 3       | scaffold 36: 3273-3407                 |
| <i>SIX6</i> | FJ755835  | unidentified #3<br>PH2007 <sup>76</sup>    | 195                 | 7                | 0       | scaffold 22: 761399-762125             |
| <i>SIX7</i> | FJ755836  | unidentified #5<br>PH2007 <sup>76</sup>    | 201                 | 3                | 0       | scaffold 51: 65216-65875               |
| <i>ORX1</i> | AM236600  | Houterman <i>et al.</i> 2007 <sup>76</sup> | 588                 | 2                | 7       | scaffold 22: 88830929-833119           |

<sup>1</sup> PH2007: previously described as unidentified, in Houterman *et al.*, 2007<sup>76</sup>.

<sup>2</sup> In amino acids, without predicted signal peptide; between brackets without predicted prodomain.

<sup>3</sup> Number of cysteine residues.

<sup>4</sup> In strain 4287 (<http://www.broad.mit.edu/>).

**Table S24. Double resistant colonies per million ( $10^6$ ) colony forming units.**

| receiving strain | Experiment |       |       |                             |                             |
|------------------|------------|-------|-------|-----------------------------|-----------------------------|
|                  | 1 (a)      | 2 (b) | 3 (b) | 4 (c)<br>average ± st. dev. | 5 (c)<br>average ± st. dev. |
| Fol 7            | 0.13       | 0.69  |       | 0.04 ± 0.03                 | 0 ± 0                       |
| Fol 8            | 0.12       |       |       | 0.06 ± 0.04                 | 0 ± 0                       |
| Fol 9            | 0.08       | 11.16 |       |                             |                             |
| Fom H1*          | 0.05       | 0     |       |                             |                             |
| Fom H2*          | 30         |       |       | 0 ± 0                       | 0 ± 0                       |
| Fom H3*          | 10         | 6.98  |       | 1.17 ± 0.33                 | 6.98 ± 4.25                 |
| Fo H1*           | 1.77       | 2.73  |       |                             |                             |
| Fo H2*           | 0.35       |       | 0.84  | 1.13 ± 0.10                 |                             |
| Fo H3*           | 1.85       | 0     | 2.1   | 0.79 ± 0.45                 |                             |
| Foc H1           | 0          | 0     |       |                             |                             |
| Foc H2           | 0          |       |       |                             |                             |

empty box: not determined

- (a): Mixed spores were used to incubate four different co-incubation plates.  
Spores from the co-incubation were pooled before plating on selective medium.
- (b): Mixed spores were used to incubate only one co-incubation plate.
- (c): Mixed spores were used to incubate three different co-incubation plates.  
Spores from the co-incubation plates were plated separately on selective medium and the average number of double resistant colonies was calculated.
- \* double resistant colonies from this experiment were used for further analyses.

**Table S25A. Chromosomal –specific primers based Foxy insertion sites in each chromosome**

| Primer name*      | Sequence              | Band in Fol007**               | Selected as markers |
|-------------------|-----------------------|--------------------------------|---------------------|
| chr1sc1fwd1L      | ATATGAAAGGGGTCAAGGA   | no (smaller band)              |                     |
| chr1sc1fwd2K      | GATCTAATTGAGTTATGAGCC | no                             |                     |
| chr1sc1fwd3L      | TCCTGAGAACTTTCTCAGC   | YES                            | X                   |
| chr1sc27fwd1K     | TTACCGAGCAGGAGACGAGC  | YES                            | X                   |
| chr2sc6fwd1L      | AAAAGAATTGCTCGCGCTCT  | YES                            | X                   |
| chr2sc6fwd2K      | GAATTCTCTCGGCATCACT   | YES                            |                     |
| chr2sc10fwd1L     | GAATTCCTTGTAGAGGTGCT  | YES                            | X                   |
| chr2sc31fwd1K     | TCTACCCGGGTCTTCCAACG  | YES                            | X                   |
| chr3sc7fwd1L      | GTACCGATAATATGCCATAC  | no                             |                     |
| chr3sc7fwd2K-chr6 | GTATGCCACTCAAAACAATC  | YES (also anneals to chr6sc33) | X                   |
| chr3sc18fwd1L     | GAGCAGATGGGCGTTCCTA   | YES                            |                     |
| chr3sc18fwd2K     | GTGTACGAATCTTACAATGAC | YES                            |                     |
| chr3sc25fwd1L     | ATTTACAGGGTTGCGCGAAC  | YES                            | X                   |
| chr4sc4fwd1K      | GGCACTATCAACTGTTAATC  | YES                            | X                   |
| chr4sc4fwd2L      | AGTCCCTTGCGTCCAACCGA  | YES (weak)                     |                     |
| chr4sc8fwd1K      | TAGATCCTCCCCTGGTGTCC  | YES                            | X                   |
| chr5sc2fwd1L      | ACCTCCCGAGAAGGTTATCA  | YES                            | X                   |
| chr5sc2fwd2K      | CAAACCTAATACTCAACGG   | YES                            |                     |
| chr5sc2fwd3L      | CCCATGCAGCTTCAAAGTCG  | no                             |                     |
| chr5sc26fwd1K     | AAAGTTGGCGAACTTAGGGA  | YES                            | X                   |
| chr6sc9fwd1L      | ATTCATTGTACATGCAGCC   | YES (weak)                     | X                   |
| chr6sc9fwd2K-chr3 | CATCAACCAGTTATGACATC  | YES                            |                     |
| chr6sc21fwd1L     | ACAAGACGAAAAGGCATGG   | YES (also anneals to chr3sc18) | X                   |
| chr7sc5fwd1K      | GAGGAGATCAAGGACATTTT  | YES                            | X                   |
| chr7sc5fwd2L      | TCAGCGGGTTCGAGGGCAAT  | no (smaller band)              |                     |
| chr7sc13fwd1K     | GGAAAGTCTCCGTGGCTTG   | YES                            |                     |
| chr7sc13fwd2L     | CTTGTCATTTCTGAGCCTTG  | YES                            | X                   |
| chr8sc3fwd1K      | ACCTTGAGGAAATAAACTG   | no                             |                     |

|                |                        |                   |   |
|----------------|------------------------|-------------------|---|
| chr8sc3fwd2L   | CACTTCGAATACGTAGGCTG   | YES               | X |
| chr8sc3fwd3K   | ACGTGCAGTGCATTCATGGC   | YES               | X |
| chr9sc11fwd1L  | TATGCTGTTCCCCAGTCGCT   | YES               | X |
| chr9sc11fwd2K  | TGAAGTGGACTAAGGAGGAG   | no (smaller band) |   |
| chr9sc17fwd1L  | CTCCTTACTTCAACGGCGTC   | no                |   |
| chr10sc15fwd1L | GCATAAACGCCGAGCCTCCA   | YES               | X |
| chr10sc20fwd1K | GTTCTGAATGTCCTGAGGAA   | YES (weak)        | X |
| chr10sc20fwd2L | GGACCTATCAAGTTCCGTGT   | no                |   |
| chr11sc12fwd1K | GGGCATAATTAAGCAGTGAT   | YES               | X |
| chr11sc12fwd2L | GGACGGAGGGTAACAGGTAC   | YES               |   |
| chr11sc12fwd3K | GCGAAAACCTTGCTTTTAAG   | YES               | X |
| chr12sc19fwd1L | GTTATAACGAACTGCGGTGG   | YES (weak)        |   |
| chr12sc19fwd2K | GGGCATTTATATGGTTCAGT   | YES               | X |
| chr12sc23fwd1L | GAACGCTCGCGTGATGAAGC   | YES               | X |
| chr13sc16fwd1K | TACTGCTTGCCTCGGGGATG   | YES               | X |
| chr13sc16fwd2L | AGGCATCGTTTAATCGTTGG   | YES               | X |
| chr14sc22fwd1K | ATTCATAATCTGGCGGCTC    | no                |   |
| chr14sc36fwd1L | ACTATTAACAATCACGAGGAC  | YES               | X |
| chr15sc24fwd1L | ACCGCACAAGACTCAACTAT   | YES (weak)        | X |
| chr15sc28fwd1K | TTTAGGGCCCACGTGCAGAC   | YES               | X |
| HYG-F          | GTTGGTCAAGACCAATGCGGAG |                   |   |
| HYG-R          | TGCACAGGGTGTACGTTGC    |                   |   |
| BLE-F          | TCCTTCCCATCCCTTATTCC   |                   |   |
| BLE-R          | CACGAAGTGCACGCAGTTG    |                   |   |
| Foxy-primer    | GAGAGAATTCTGGTCGGTG    |                   | X |

\* The number behind 'chr' refers to the chromosome and the number behind 'sc' refers to the super contig on which the primer was designed. Two primers also anneal to a second supercontig on another chromosome (both on chr. 3 and 6).

\*\* Used in combination with Foxy-primer as a reverse primer.

**Table S 25B Primers based on Foxy insertions covering the duplicated region in Chr3/6**

| Primer name*   | Sequence              | Anneals on: |           | Used in     | Band present in: ** |       |    |    |    |    |
|----------------|-----------------------|-------------|-----------|-------------|---------------------|-------|----|----|----|----|
|                |                       | chr 3       | chr 6     | suppl. fig. | FoI007              | Fo-47 | 1B | 1C | 2A | 2B |
| chr3sc32fwd1K  | GTATGCCACTCAAAACAATC  | SC 32       | SC 33     |             | X                   |       |    |    |    |    |
| chr3sc18fwd3L  | TTGCAGGAGAATATCTAGAG  | SC 18       | SC 21     |             | X                   |       |    | X  | X  |    |
| chr3sc18fwd4K  | TATCAAGAGATATGCAGAGC  | SC 18       | SC 21     |             | X                   |       |    | X  | X  |    |
| chr3sc18fwd1L  | GAGCAGATGGGCGTTCCCTA  | SC 18       | SC 21     | S20 A       | X                   |       |    | X  | X  |    |
| chr3sc18fwd5K  | ACAGGAAGAGCACCAACAAA  | SC 18       | SC 21     |             | X                   |       |    | X  | X  |    |
| chr6sc21fwd1L  | ACAAGACGAAAAAGGCATGG  | SC 18       | SC 21     | S20 A/B     | X                   |       |    | X  | X  |    |
| chr3sc18fwd6K  | AGTGATAGAAAGTTGAGAAAG | SC 18       | SC 21     |             | X                   |       |    | X  | X  |    |
| chr3sc18fwd7L  | TGCAGGGTGCCTAGATTG    | SC 18       | SC 21     |             | X                   |       |    | X  | X  |    |
| chr3sc18fwd8K  | TGCATGCAGGATAATCAATC  | SC 18       | SC 21     |             | X                   |       |    | X  | X  |    |
| chr3sc18fwd9L  | TATGCGTGAAGTTCTTCGGC  | SC 18       | SC 21, 41 |             | X                   | X     | X  | X  | X  | X  |
| chr3sc18fwd2K  | GTGTACGAATCTTACAATGAC | SC 18       | SC 21, 41 | S20 A       | X                   |       |    | X  | X  |    |
| chr3sc18fwd11L | TCTAATCAAACGCTTCAGTC  | SC 18       | SC 21, 41 |             | X                   |       |    | X  | X  |    |

\* the number behind 'chr' refers to the chromosome and the number behind 'sc' refers to the super contig on which the primer was designed.

\*\* used in combination with Foxy-primer as a reverse primer.
